# Supplementary material for: Epigenomic Analysis of RAD51 ChIP-seq Data Reveals cis-regulatory Elements Associated with Autophagy in Cancer Cell Lines
Source: Cancers (Basel). 2021 May 22;13(11):2547. doi: 10.3390/cancers13112547 (PMC8196894; doi:10.3390/cancers13112547)
Supplement: Supplementary file 1 [file cancers-13-02547-s001.zip]

Archive with 5 entries (5 files):
- Supplementary_Figures.pdf
- TableS1.xlsx
- TableS2.xlsx
- TableS3.xlsx
- TableS4.xlsx
