# Supplementary material for: Epigenomic Analysis of RAD51 ChIP-seq Data Reveals cis-regulatory Elements Associated with Autophagy in Cancer Cell Lines
Source: Cancers (Basel). 2021 May 22;13(11):2547. doi: 10.3390/cancers13112547 (PMC8196894; doi:10.3390/cancers13112547)
Supplement: Supplementary file 1 [file cancers-13-02547-s001.zip › TableS1.xlsx]

## Sheet: Sheet1
Table S1. ChIP-seq data reanalyzed in this study.
Cell line	Antibody	Accession ID	Replicate
GM12878	bHLHE40	ENCFF000VSD	rep1
GM12878	bHLHE40	ENCFF000VSF	rep2
GM12878	BRCA1	ENCFF000VSY	rep1
GM12878	BRCA1	ENCFF000VTI	rep2
GM12878	H3K27ac	ENCFF000ASU	rep1
GM12878	H3K27ac	ENCFF000ASP	rep2
GM12878	H3K4me3	ENCFF825QGB	rep1
GM12878	H3K4me3	ENCFF598WCX	rep2
GM12878	RAD51	ENCLB500DUK	rep1
GM12878	RAD51	ENCLB269SHK	rep2
GM12878	USF1	ENCFF000OHD	rep1
GM12878	USF1	ENCFF000OHN	rep2
GM12878	USF2	ENCFF000WGB	rep1
GM12878	USF2	ENCFF000WGC	rep2
GM12878	YY1	ENCFF000OHH	rep1
GM12878	YY1	ENCFF000OHO	rep2
HepG2	ARNTL	ENCFF895UEX	rep1
HepG2	ARNTL	ENCFF912EDI	rep2
HepG2	bHLHE40	ENCFF000PFY	rep1
HepG2	bHLHE40	ENCFF000PGB	rep2
HepG2	BRCA1	ENCFF000XPL	rep1
HepG2	BRCA1	ENCFF000XPS	rep2
HepG2	TEAD3	ENCFF770VIU	rep1
HepG2	TEAD3	ENCFF192BLY	rep2
HepG2	H3K27ac	ENCFF000BFD	rep1
HepG2	H3K27ac	ENCFF000BFH	rep2
HepG2	H3K4me3	ENCFF901NZE	rep1
HepG2	H3K4me3	ENCFF084IJQ	rep2
HepG2	RAD51	ENCLB586LIO	rep1
HepG2	RAD51	ENCLB215GBH	rep2
HepG2	TEAD4	ENCFF000PRU	rep1
HepG2	TEAD4	ENCFF000PRQ	rep2
HepG2	TFE3	ENCFF851FHG	rep1
HepG2	TFE3	ENCFF085MHP	rep2
HepG2	USF1	ENCFF000PSA	rep1
HepG2	USF1	ENCFF000PSH	rep2
HepG2	USF2	ENCFF000XZT	rep1
HepG2	USF2	ENCFF000XZV	rep2
HepG2	YY1	ENCFF000PSE	rep1
HepG2	YY1	ENCFF000PSD	rep2
K562	bHLHE40	ENCFF000YGJ	rep1
K562	bHLHE40	ENCFF000YGQ	rep2
K562	BRCA1	ENCLB024FCM	rep1
K562	BRCA1	ENCLB342MDN	rep2
K562	CLOCK	ENCLB666AYK	rep1
K562	CLOCK	ENCLB813RAS	rep2
K562	cMYC	ENCFF000YKO	rep1
K562	cMYC	ENCFF000YKR	rep2
K562	TEAD2	ENCLB047LXS	rep1
K562	TEAD2	ENCLB385HFC	rep2
K562	H3K27ac	ENCFF000BXH	rep1
K562	H3K27ac	ENCFF000BXG	rep2
K562	H3K4me3	ENCFF894KBP	rep1
K562	H3K4me3	ENCFF010SAE	rep2
K562	MITF	ENCLB664GQC	rep1
K562	MITF	ENCLB890WIR	rep2
K562	RAD51	ENCLB774HOZ	rep1
K562	RAD51	ENCLB961RCO	rep2
K562	TEAD4	ENCFF000QIS	rep1
K562	TEAD4	ENCFF000QIW	rep2
K562	TFE3	ENCLB742LPY	rep1
K562	TFE3	ENCLB866YUD	rep2
K562	USF1	ENCFF000QJR	rep1
K562	USF1	ENCFF000QJP	rep2
K562	USF2	ENCFF000ZDJ	rep1
K562	USF2	ENCFF000ZDK	rep2
K562	XRCC3	ENCLB231JZO	rep1
K562	XRCC3	ENCLB030KOP	rep2
K562	YY1	ENCFF000QKF	rep1
K562	YY1	ENCFF000QKI	rep2
MCF7	CLOCK	ENCLB978AQX	rep1
MCF7	CLOCK	ENCLB243TQQ	rep2
MCF7	cMYC	ENCFF000RZT	rep1
MCF7	cMYC	ENCFF000RZV	rep2
MCF7	H3K27ac	ENCFF303DDV	rep1
MCF7	H3K27ac	ENCFF787RSQ	rep2
MCF7	H3K4me3	ENCLB480UNK	rep1
MCF7	H3K4me3	ENCLB268FCU	rep2
MCF7	RAD51	ENCLB885SCC	rep1
MCF7	RAD51	ENCLB907QEV	rep2
MCF7	TEAD4	ENCFF000QSI	rep1
MCF7	TEAD4	ENCFF000QSB	rep2
