# Supplementary material for: Epigenomic Analysis of RAD51 ChIP-seq Data Reveals cis-regulatory Elements Associated with Autophagy in Cancer Cell Lines
Source: Cancers (Basel). 2021 May 22;13(11):2547. doi: 10.3390/cancers13112547 (PMC8196894; doi:10.3390/cancers13112547)
Supplement: Supplementary file 1 [file cancers-13-02547-s001.zip › TableS2.xlsx]

## Sheet: Sheet1
Table S2. Primers for RT-qPCR.
Gene name	F or R	Sequences (5' to 3')
TBP	F	CCC GAA ACG CCG AAT ATA ATC C
	R	AAT CAG TGC CGT GGT TCG TG
ATG3	F	GAC CCC GGT CCT CAA GGA A
	R	TGT AGC CCA TTG CCA TGT TGG
ATG5	F	AAA GAT GTG CTT CGA GAT GTG T
	R	CAC TTT GTC AGT TAC CAA CGT CA
